# Supplementary material for: Comparative cell adhesion properties of cysteine extended peptide architectures
Source: Royal Society of Chemistry journal article supplement (doi:10.1039/c5ra23352f), 2015-12-23
Supplement: c5ra23352f1.pdf [file c5ra23352f1.pdf]

## Supporting Information for

### Comparative cell adhesion properties of cysteine extended peptide architectures

**Saniye Soylemez<sup>a§</sup>, Bilal Demir<sup>b</sup>, Gizem Oyman Eyrilmez<sup>b</sup>, Seçkin Kesici<sup>a</sup>, Aytül Saylam<sup>a</sup>, Dilek Odaci Demirkol<sup>b</sup>, Salih Özçubukçu<sup>a</sup>, Suna Timur<sup>b,c\*</sup>, Levent Toppare<sup>a,d,e,f\*</sup>**

<sup>a</sup>Department of Chemistry, Middle East Technical University, Ankara 06800, Turkey

<sup>b</sup>Department of Biochemistry, Ege University, Izmir 35100, Turkey

<sup>c</sup>Institute of Drug Abuse Toxicology & Pharmaceutical Sciences, Izmir 35100, Turkey

<sup>d</sup>Department of Biotechnology, Middle East Technical University, Ankara 06800, Turkey

<sup>e</sup>Department of Polymer Science and Technology, Middle East Technical University, Ankara 06800, Turkey

<sup>f</sup>The Center for Solar Energy Research and Application (GUNAM), Middle East Technical University, Ankara 06800, Turkey.

<sup>§</sup>On leave from Ordu University.

Corresponding-Authors,

Suna Timur,

Ege University, Department of Biochemistry, 35100, Izmir, Turkey

Fax: (+902323438624); Phone: (+902323115425); E-mail: (suna.timur@ege.edu.tr)

Levent Toppare,

Middle East Technical University, Department of Chemistry, 06800, Ankara, Turkey

Fax: (+903122103200); Phone: (+903122103251); E-mail: (toppare@metu.edu.tr)

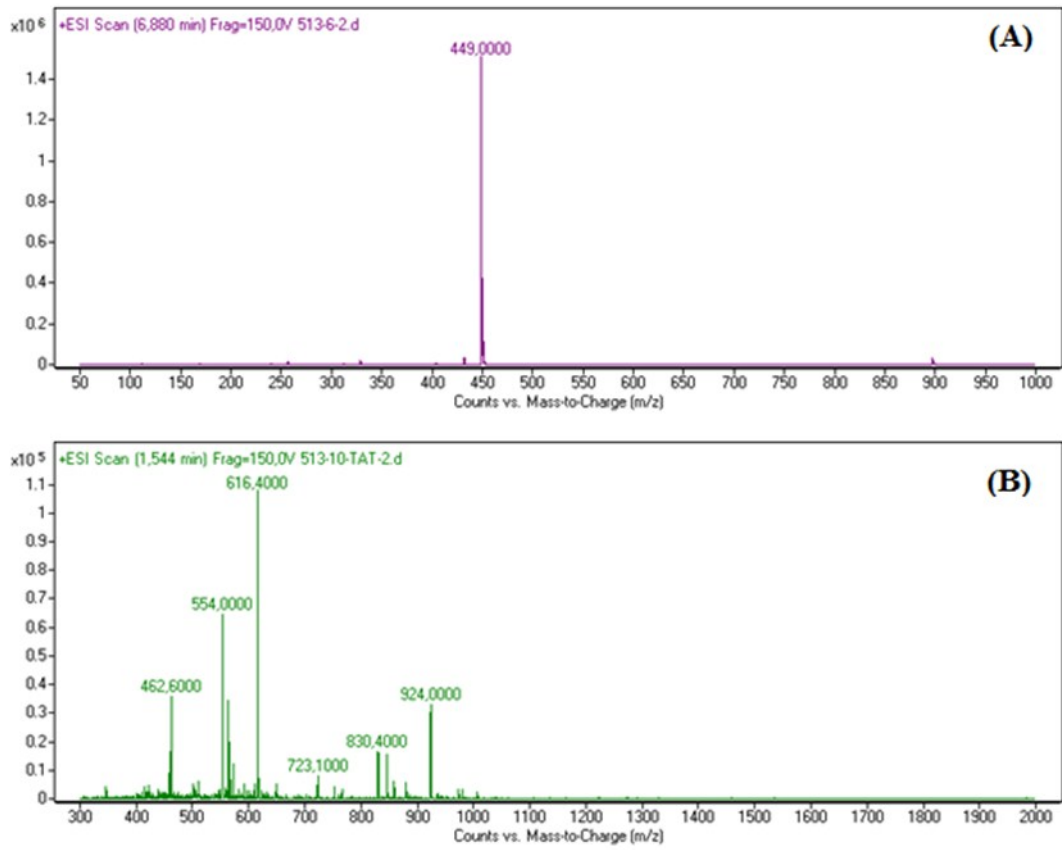

**Fig. S1.** Mass spectra of the (A) RGDC-NH<sub>2</sub> and (B) TATC-NH<sub>2</sub> peptides

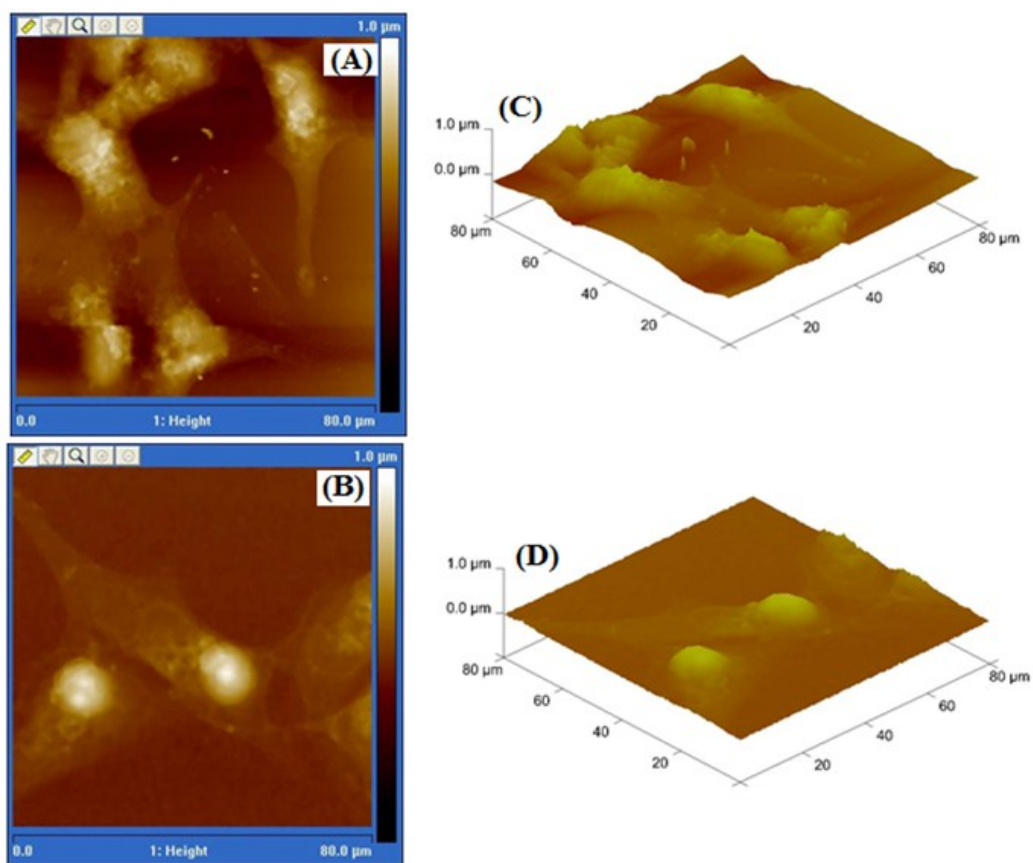

**Fig. S2.** 2-D (A and B) and 3-D (C and D) topographic AFM height images of U87-MG/RGDC/Gold/ITO (A and C) and U87-MG/TATC/Gold/ITO (B and D) modified electrode surface.

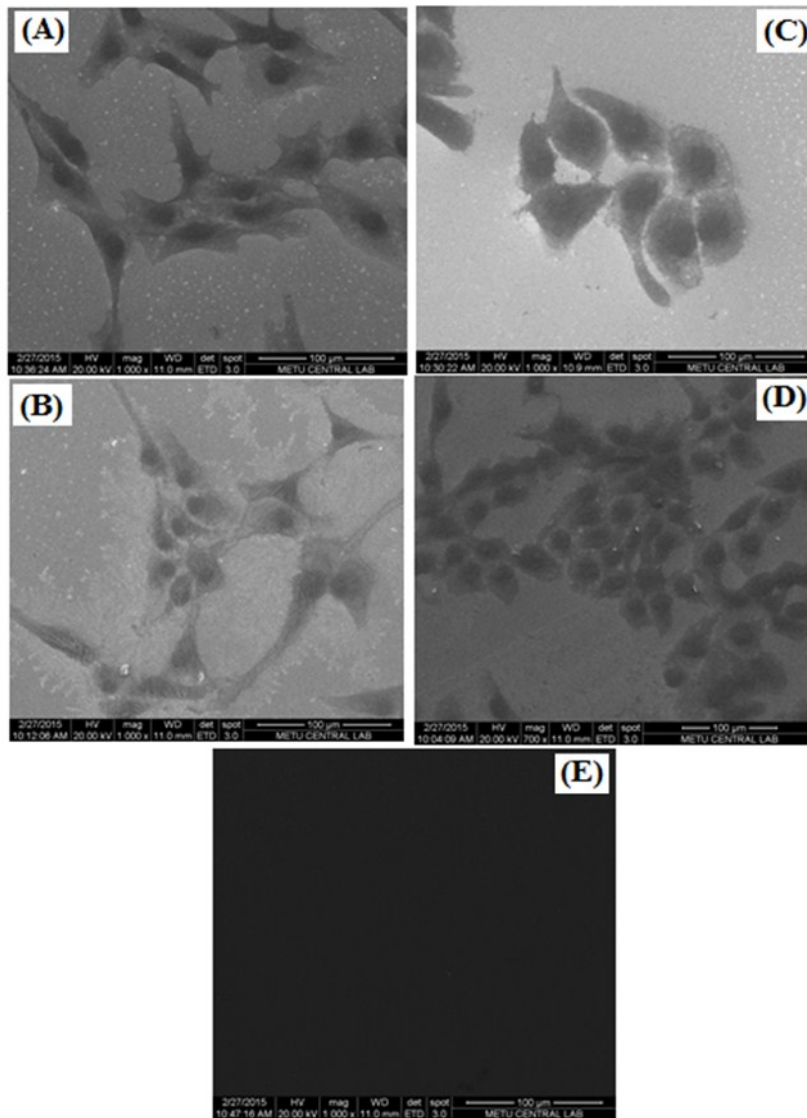

**Fig. S3.** Surface characteristics of (A) U87-MG/RGDC/Gold/ITO (B) U87-MG/TATC/Gold/ITO (C) Vero/RGDC/Gold/ITO (D) Vero/TATC/Gold/ITO and (E) Gold/ITO via SEM images.

**Table S1.** The linearity characteristics for the RGDC and TATC modified Gold/ITO surfaces within different cell lines.

| <b>Modified Surfaces</b> | <b>Cell lines</b> | <b>Linear range (Cells/mL)</b>    | <b>Linearity Equation</b> | <b>R<sup>2</sup></b> |
|--------------------------|-------------------|-----------------------------------|---------------------------|----------------------|
| RGDC/Gold/ITO            | U87-MG            | 10 - 10 <sup>5</sup>              | y = 0.34x + 1.48          | 0.994                |
|                          | HeLa              | 10 - 10 <sup>5</sup>              | y = 0.32x + 0.94          | 0.994                |
|                          | Vero              | 10 <sup>2</sup> - 10 <sup>5</sup> | y = 0.467x + 0.39         | 0.991                |
| TATC/Gold/ITO            | U87-MG            | 10 - 10 <sup>4</sup>              | y = 0.32x + 1.77          | 0.999                |
|                          | HeLa              | 10 <sup>2</sup> - 10 <sup>5</sup> | y = 0.376x + 1.42         | 0.990                |
|                          | Vero              | 10 - 10 <sup>4</sup>              | y = 0.38x + 1.59          | 0.988                |
